# Supplementary material for: From ancient wisdom to modern building materials: high-strength, low-carbon bio-mineral composites inspired by traditional architecture
Source: Royal Society of Chemistry journal article supplement (doi:10.1039/d5ta09316c), 2026-01-01
Supplement: d5ta09316c1.pdf [file d5ta09316c1.pdf]

Supporting Information

**From Ancient Wisdom to Modern Building Material: High-Strength, Low-Carbon  
Bio-Mineral Composites Inspired by Traditional Architecture**

Yang Yao, Wanlin Wu, Rui Xiong\*

National Key Laboratory of Advanced Polymer Materials, Polymer Research Institute,  
Sichuan University, Chengdu 610065, China

\*Corresponding author. Email: rui.xiong@scu.edu.cn (R. X.)

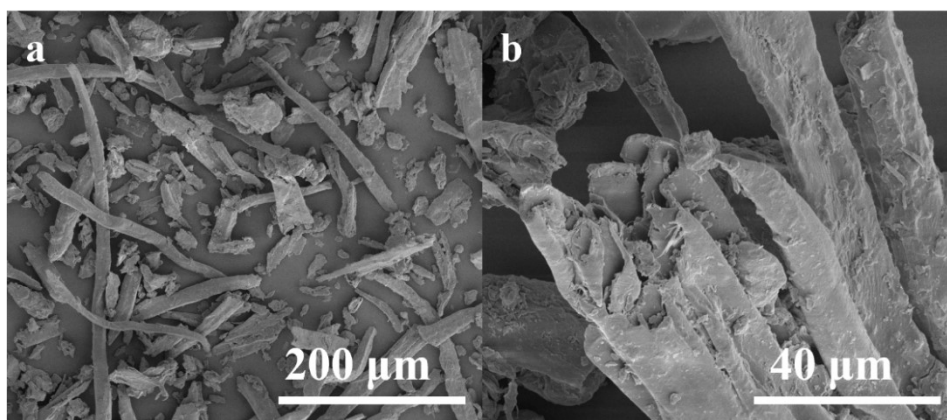

**Figure S1** a) SEM images and b) higher magnification of wood chips.

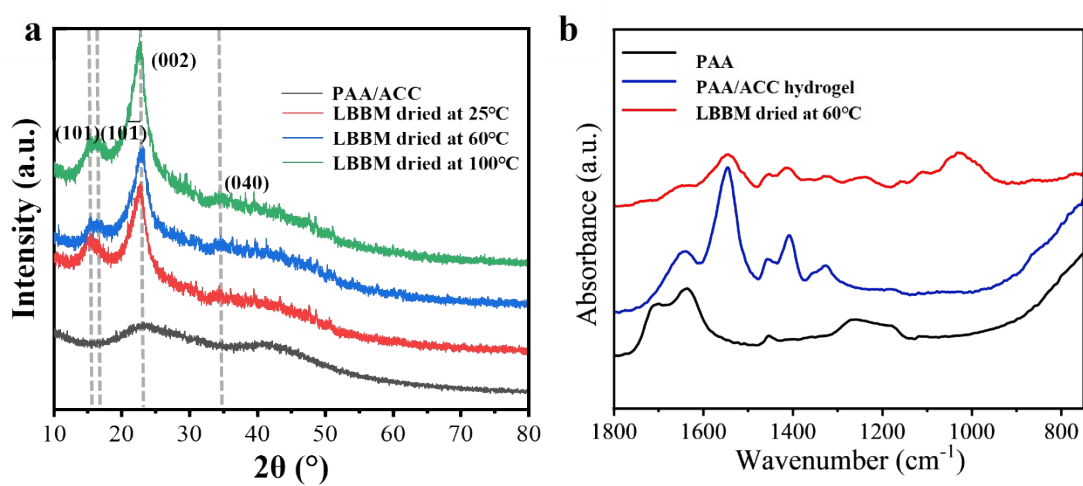

**Figure S2** a) The XRD spectrum of PAA/ACC hydrogel and LBBM dried at 25  $^\circ\text{C}$ , 60  $^\circ\text{C}$ , 100  $^\circ\text{C}$ . b) The ATR-FTIR spectra of PAA, PAA/ACC hydrogel and LBBM dried at 60  $^\circ\text{C}$ .

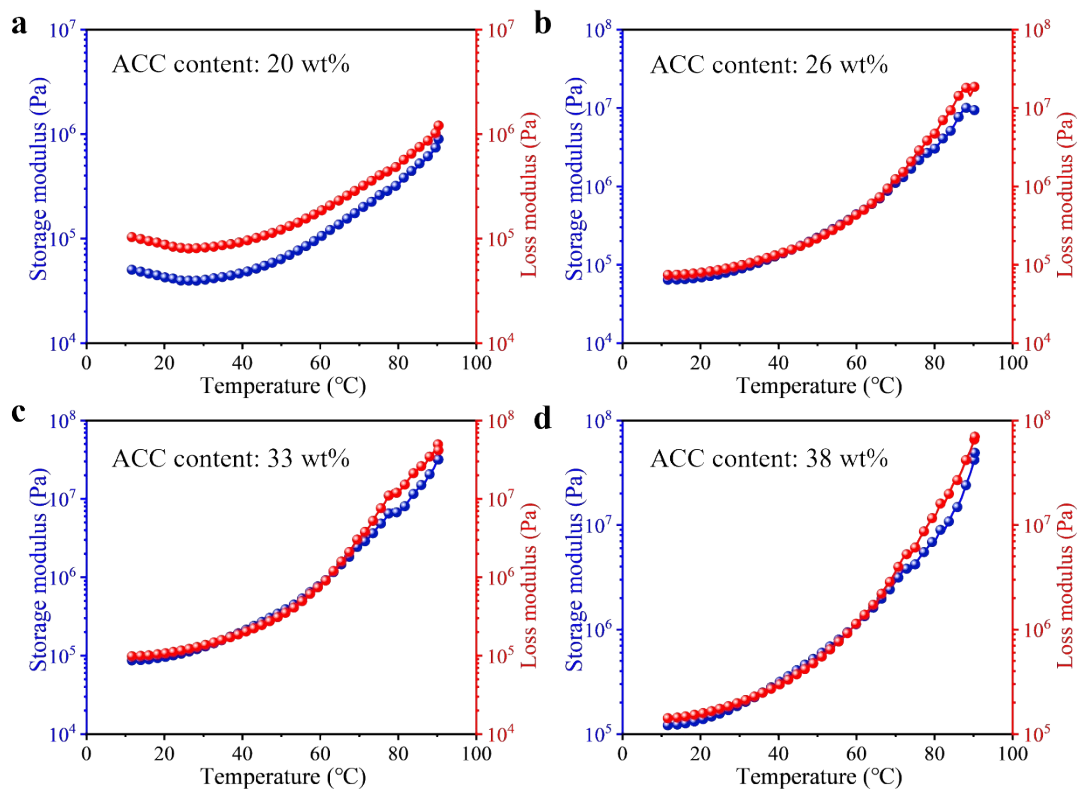

**Figure S3** Temperature dependencies of the storage and loss modulus of PAA/ACC mineral hydrogel with different ACC content: a) 20 wt%, b) 26 wt%, c) 33 wt% and d) 38 wt%.

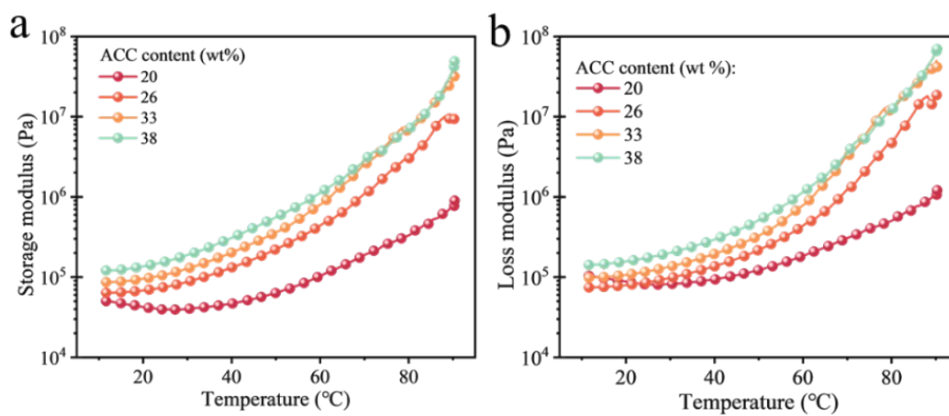

**Figure S4** Temperature dependencies of the a) storage and b) loss modulus of PAA/ACC mineral hydrogel with different ACC content (from 20 wt% to 38 wt%).

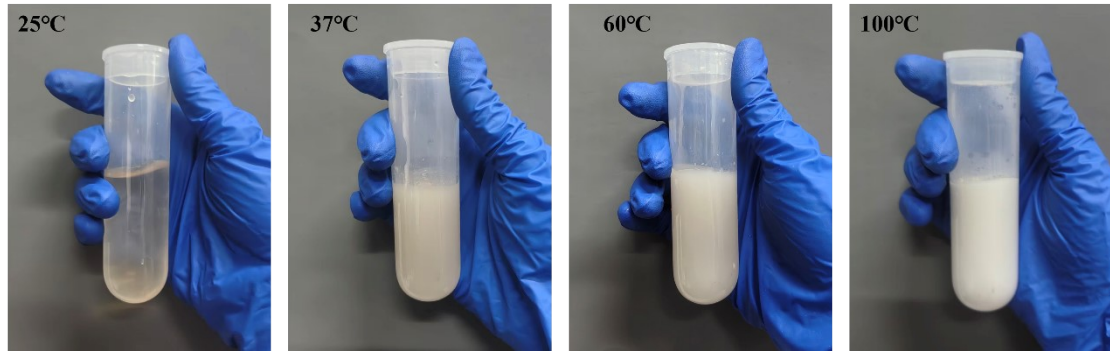

**Figure S5** Physical diagram of the mineral hydrogel's response to different temperatures

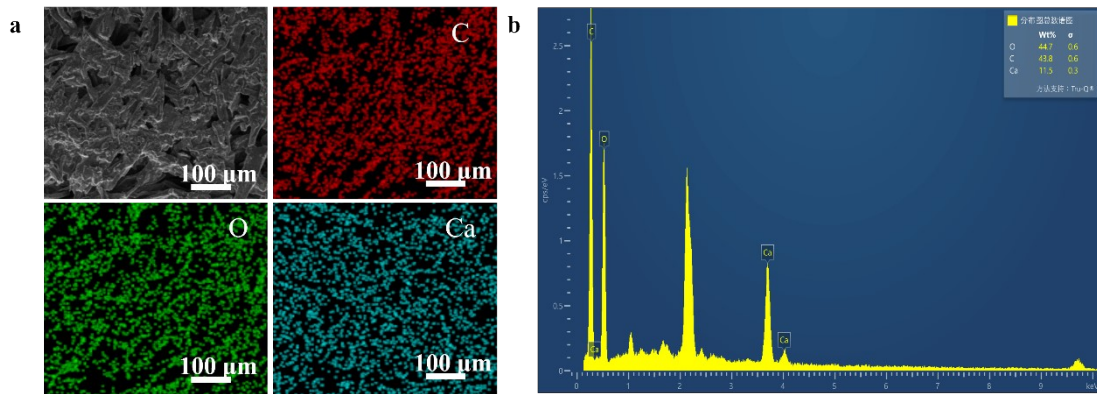

**Figure S6** a) SEM image of the as-prepared 60 °C dried LBBM and the corresponding elemental mapping images of C, O and Ca in LBBM. b) EDS spectrum of cross-sections of the as-prepared dried LBBM.

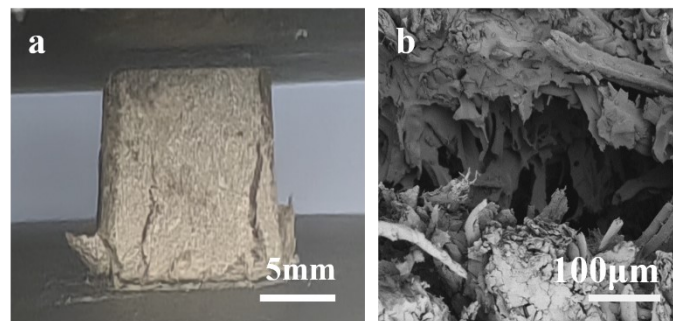

**Figure S7** a) Optical images of LBBM under compression tests and b) SEM images of crack

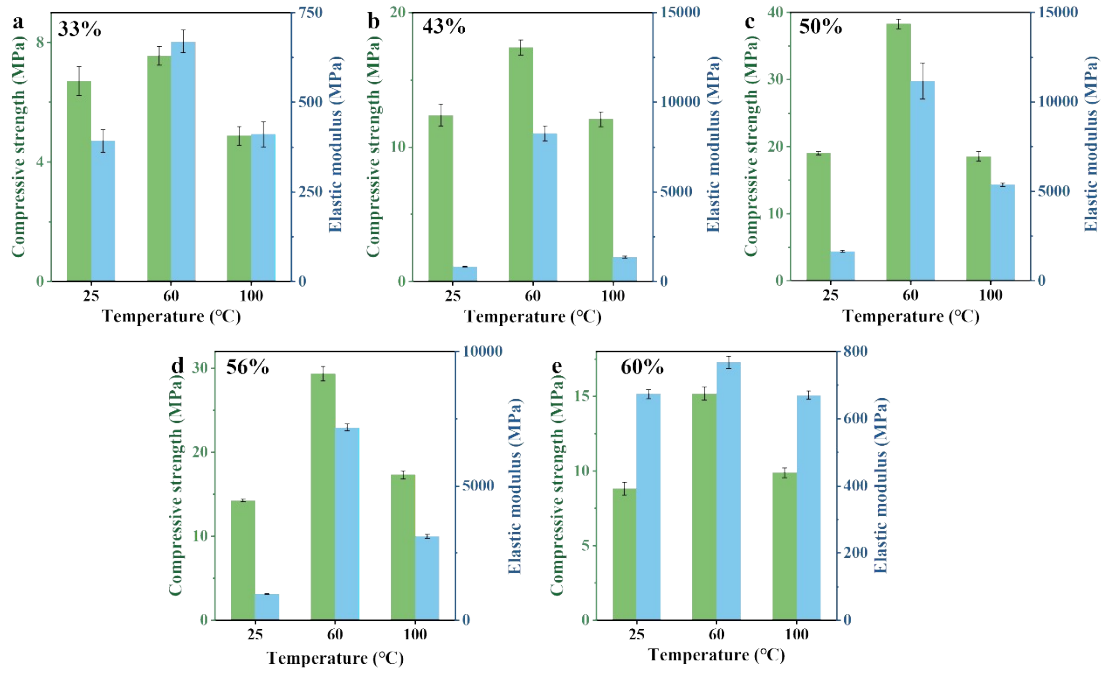

**Figure S8** Compressive strength and elastic modulus of LBBM materials under different drying temperatures with varying mass percentage of WS: a)33%, b)43%, c)50%, d) 56% and e) 60%.

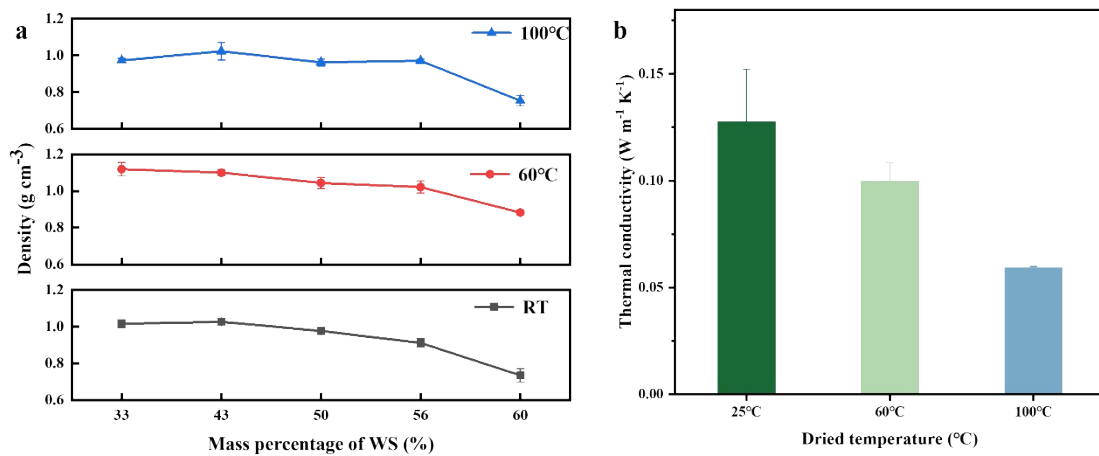

**Figure S9** a) Density changes of LBBMs under different drying temperatures with varying mass percentage of WS. b) Thermal conductivity changes of LBBM composites dried at different temperatures with 50% WS content.

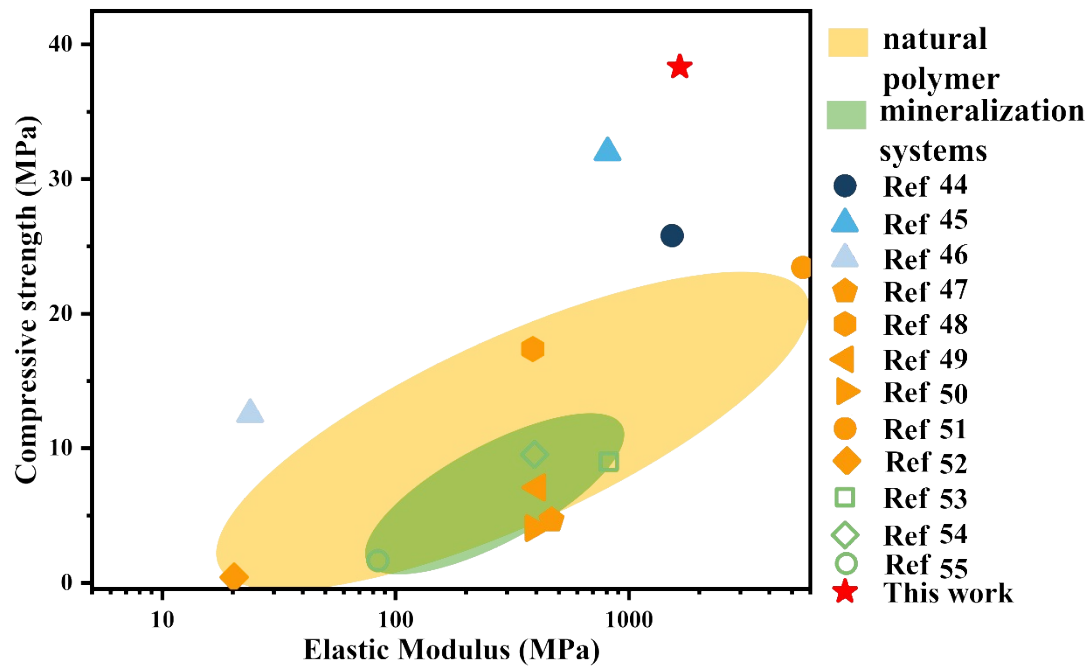

**Figure S10** Comparison of compressive strengths and elastic modulus between LBBM with different bio-polymer adhesive contents and previously reported natural-based building materials, including natural polymer, mineralization systems and other newly reported innovative building materials.

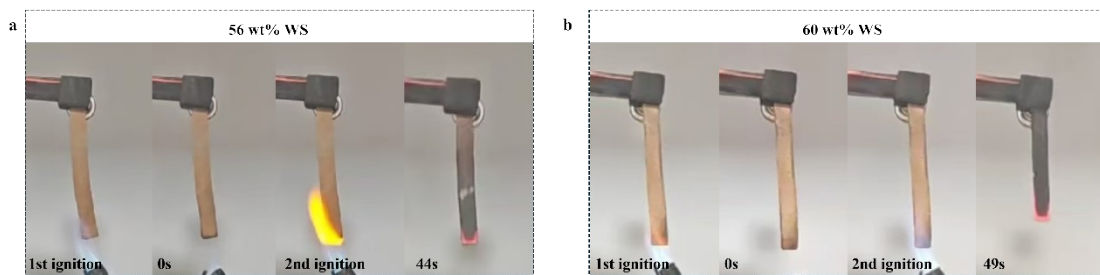

**Figure S11** Digital photos of LBBM dried at 60 °C with 56 and 60 percent of WS content in vertical burning tests.

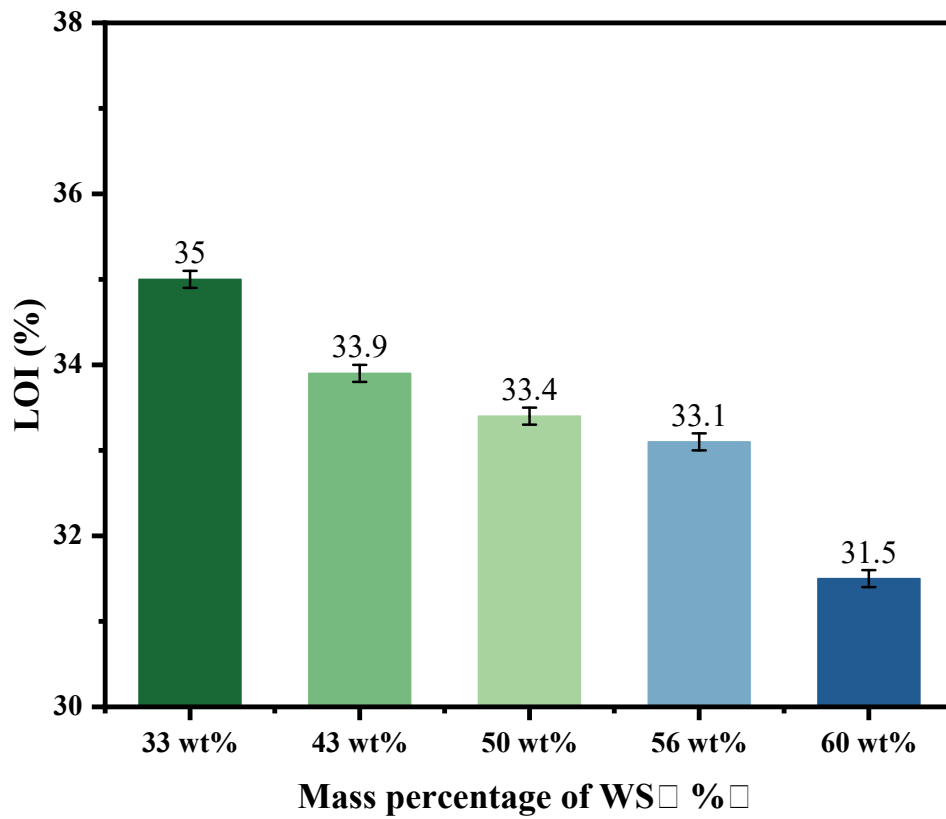

**Figure S12** LOI testing results for LBBM dried at 60 °C with different mass percentage of WS content.

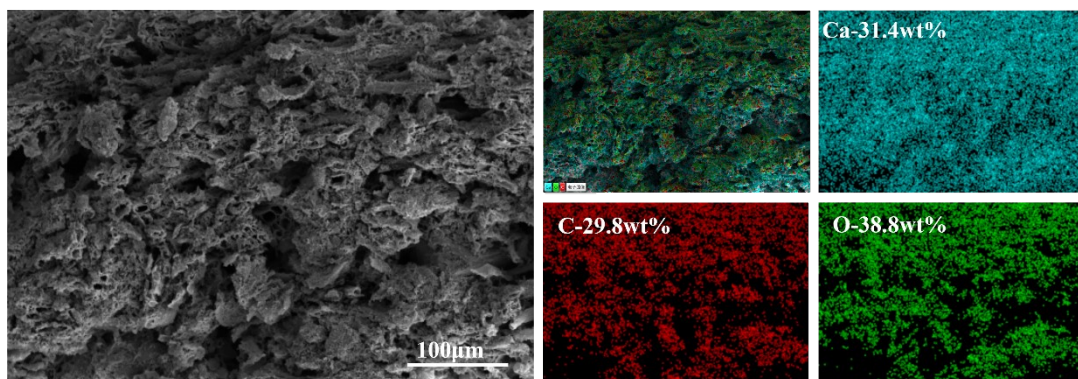

**Figure S13** SEM images and EDS mappings of the top surface from LBBM dried at 60 °C with 50 percentage of WS content after burning.

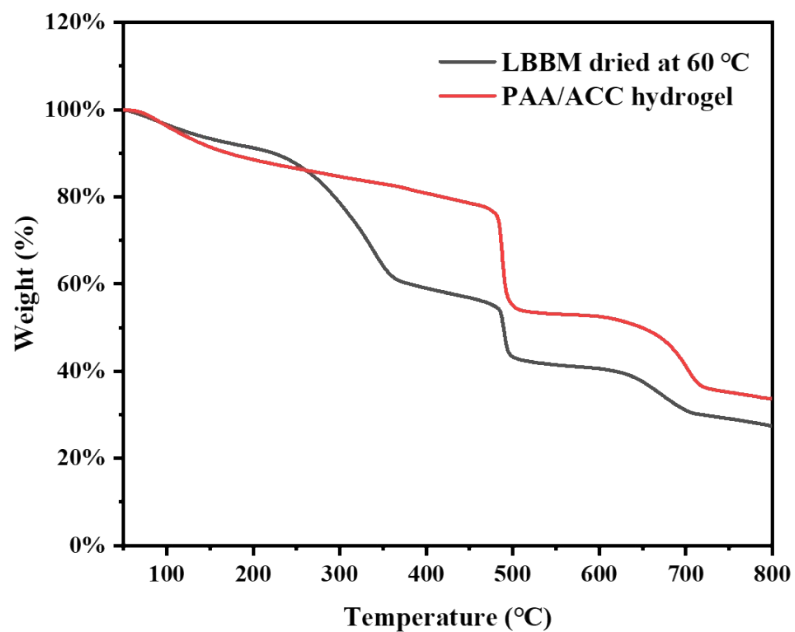

**Figure S14** The thermogravimetric analysis of PAA/ACC hydrogel and LBBM dried at 60 °C with 50 wt% WS content.

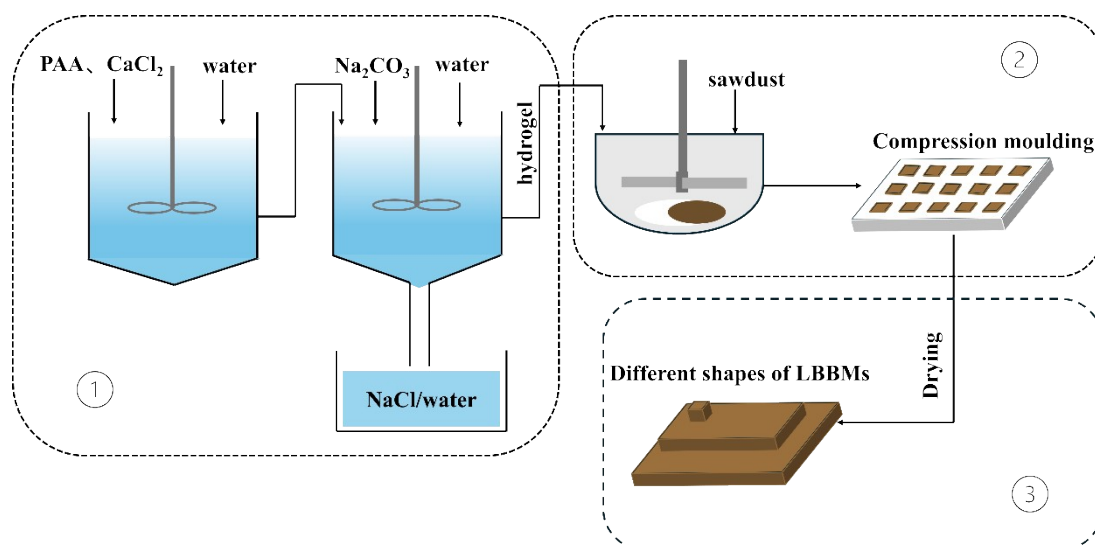

**Figure S15** The chart of the LBBMs production.

**Table S1 Multiplication results of the signs of each cross-peak in 2DCOS synchronous and asynchronous spectra of LBBM (Figure 2I).**

|             |             |             |             |             |             |
|-------------|-------------|-------------|-------------|-------------|-------------|
| <b>2957</b> | –           | –           | –           | –           |             |
| <b>3200</b> | +           | –           | –           |             |             |
| <b>3274</b> | +           | +           |             |             |             |
| <b>3300</b> | +           |             |             |             |             |
| <b>3420</b> |             |             |             |             |             |
|             | <b>3420</b> | <b>3300</b> | <b>3274</b> | <b>3200</b> | <b>2957</b> |

According to Noda's rule, the final specific order for LBBM during heating is given as follows: 2957 → 3420 → 3300 → 3200 → 3274 cm<sup>-1</sup> (→ means prior to or earlier than), i.e. vs(CH<sub>2</sub>) → v(OH) (strongly bound water) → v(OH) (moderately bound water).

**Table S2 The UL-94 grade and LOI value of LBBM**

| <b>Samples</b>    | <b>UL-94</b> |     |        | <b>LOI</b> |
|-------------------|--------------|-----|--------|------------|
|                   | T1           | T2  | Rating |            |
| <b>33 wt % WS</b> | 0s           | 0s  | V-0    | 35%        |
| <b>50 wt % WS</b> | 0s           | 10s | V-0    | 33.4%      |
| <b>56 wt % WS</b> | 0s           | 44s | NR     | 33.1%      |
| <b>60 wt % WS</b> | 0s           | 49s | NR     | 31.5%      |

**Table S3 Inputs and outputs of the LBBMs production process presented in this work.**

| <b>Input/Output</b>                       | <b>Quantity</b> | <b>Unit</b> |
|-------------------------------------------|-----------------|-------------|
| Step 1: Preparation of PAA/ACC hydrogels  |                 |             |
| Input                                     |                 |             |
| CaCl <sub>2</sub>                         | 22.196          | t           |
| Na <sub>2</sub> CO <sub>3</sub>           | 21.198          | t           |
| PAA                                       | 90.075          | t           |
| Water                                     | 1500.000        | t           |
| Energy                                    | 4583.700        | kwh         |
| Output                                    |                 |             |
| NaCl/Water                                | 1521.379        | t           |
| PAA/ACC hydrogels                         | 112.060         | t           |
| Step 2: Mixture of saw dust and hydrogels |                 |             |
| Input                                     |                 |             |
| Saw dust                                  | 60.000          | t           |
| PAA/ACC hydrogels                         | 112.060         | t           |
| Energy                                    | 143.383         | kwh         |
| Output                                    |                 |             |
| Mixture                                   | 172.060         | t           |
| Step 3: Drying of the mixture             |                 |             |
| Input                                     |                 |             |
| Mixture                                   | 172.060         | t           |
| Output                                    |                 |             |
| LBBMs                                     | 116.03          | t           |
| Water vapour                              | 56.03           | t           |

**(1) Step 1: Preparation of PAA/ACC hydrogels :**

The power of the agitator is 22kW, the maximum stirring capacity is 20000 L, the stirring time is 2.778h.

A blender consumes a lot of electricity when working :  $22 \times 2.78 = 61.116$  kWh,

The number of mixers required :  $1500t \times 1000kg = 1.5 \times 10^6$  kg ,  $1.5 \times 10^6$  kg/1000kg per m<sup>3</sup>=1500 m<sup>3</sup>=  $1.5 \times 10^6$  L,  $1.5 \times 10^6 / 20000 = 75$  ,

Total power consumption :  $75 \times 61.116 = 4583.700$  kWh

**(2) Step 2: Mixture of saw dust and hydrogels:**

The power of the concrete mixer is 11kW, the maximum stirring capacity is 5000 L, the stirring time is 20min.

A concrete mixer consumes a lot of electricity when in operation :  $11 \div 3 \approx 3.667$

kWh,

The volume of the mixture of hydrogel and wood chips : Suppose the densities of the mixtures are close  $0.88\text{g/cm}^3=0.88\text{kg/L}$ ,  $172060\text{kg}\div 0.88\text{kg/L}\approx 195522.727\text{L}$

Total power consumption :  $11\div 3*(195522.7273\text{L}/5000\text{L})\approx 143.383\text{ kWh}$

(3) Step 3: Drying of the mixture: Suppose solar energy is used for drying

Table S4 The benchmark parameter table of functional units for life cycle assessment (LCA):functional properties of the LBBMs and conventional building materials.

| Materials   | Average density (g/cm <sup>3</sup> ) | Average compressive strength (MPa) |
|-------------|--------------------------------------|------------------------------------|
| Cement      | 2                                    | 18                                 |
| Clay brick  | 1.6                                  | 12                                 |
| Shale brick | 2.2                                  | 20                                 |
| LBBM        | 1.04                                 | 38.3                               |

**Table S5 Average environmental impacts of the LBBMs and conventional building materials.**

|                                                                                      | Cement   | Clay brick | Shale brick | LBBM     |
|--------------------------------------------------------------------------------------|----------|------------|-------------|----------|
| Global warming impact (kg CO <sub>2</sub> eq per cm <sup>3</sup> /MPa)               | 1.03E-04 | 3.63E-05   | 2.14E-05    | 1.47E-05 |
| Mineral resource scarcity (kg Cu eq per cm <sup>3</sup> /MPa)                        | 4.06E-07 | 1.95E-06   | 1.08E-07    | 3.97E-08 |
| Fossil resource scarcity (kg oil eq per cm <sup>3</sup> /MPa)                        | 9.95E-06 | 7.64E-06   | 6.76E-06    | 5.59E-06 |
| Terrestrial acidification (kg SO <sub>2</sub> eq per cm <sup>3</sup> /MPa)           | 1.67E-07 | 6.42E-08   | 4.27E-08    | 4.79E-08 |
| Stratospheric ozone depletion (kg CFC 11eq per cm <sup>3</sup> /MPa)                 | 5.48E-12 | 3.21E-12   | 5.60E-12    | 2.82E-12 |
| Ozone formation, Human health (kg NO <sub>x</sub> eq per cm <sup>3</sup> /MPa)       | 2.02E-07 | 7.76E-08   | 4.58E-08    | 3.74E-08 |
| Freshwater eutrophication (kg P eq per cm <sup>3</sup> /MPa)                         | 1.12E-08 | 4.91E-09   | 5.41E-09    | 4.75E-09 |
| Freshwater ecotoxicity (kg 1,4-DCB per cm <sup>3</sup> /MPa)                         | 1.10E-06 | 7.13E-07   | 1.62E-06    | 5.38E-07 |
| Ionizing radiation (kBq Co-60 eq per cm <sup>3</sup> /MPa)                           | 6.44E-07 | 4.73E-07   | 9.90E-07    | 3.85E-07 |
| Fine particulate matter formation (kg PM <sub>2.5</sub> eq per cm <sup>3</sup> /MPa) | 6.83E-08 | 2.89E-08   | 2.55E-08    | 1.97E-08 |

**Note : The influence brought by the moisture required for cement to form lumps was ignored.**
